# Supplementary material for: Anomalous reactivity of radical cations produced by photosensitized oxidation of 4-methoxybenzyl alcohol derivatives: role of the sensitizer
Source: Royal Society of Chemistry journal article supplement (doi:10.1039/b711541e), 2007-10-16

## Supplementary Information

**for**

### Anomalous Reactivity of Radical Cations Produced by Photosensitized Oxidation of Benzyl Alcohol Derivatives: Role of the Sensitizer.

Tiziana Del Giacco, Annalisa Faltoni and Fausto Elisei

|                  |           |
|------------------|-----------|
| <b>Figure S1</b> | <b>S2</b> |
| <b>Figure S2</b> | <b>S2</b> |
| <b>Figure S3</b> | <b>S3</b> |
| <b>Figure S4</b> | <b>S3</b> |

**Fig. S1** Stern-Volmer plots for the fluorescence quenching of  $\text{NMQ}^+\text{BF}_4^-$  by **1a** (○), **1b** (△), **1c** (●) and **1d** (▲) in air-equilibrated  $\text{CH}_2\text{Cl}_2$ .

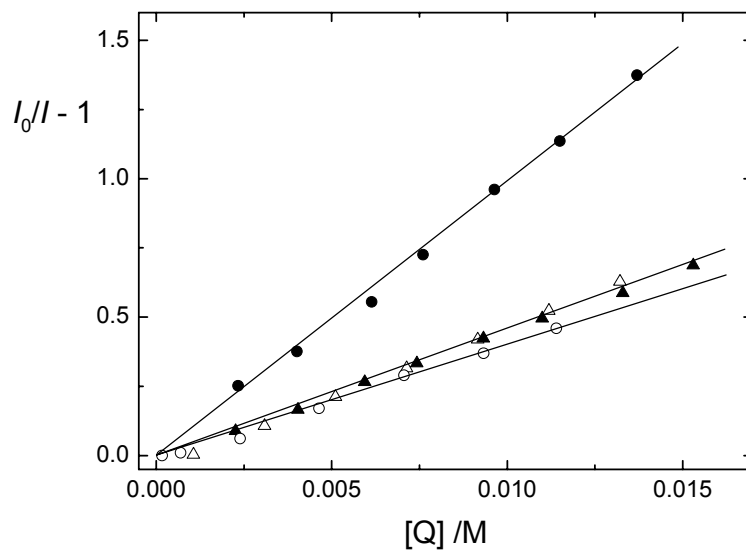

**Fig. S2** Stern-Volmer plots for the fluorescence quenching of DCA by **1a** (○), **1b** (△), **1c** (●) and **1d** (▲) in air-equilibrated  $\text{CH}_2\text{Cl}_2$ .

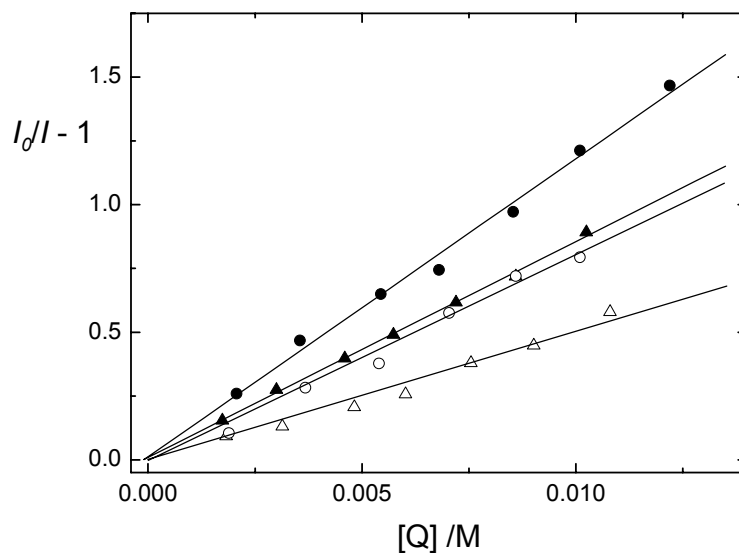

**Fig. S3** Time-resolved absorption spectra of the  $\text{NMQ}^+\text{BF}_4^-$  ( $2.6 \times 10^{-3}$  M)/toluene (1 M)/ $\text{AnCH}_2\text{OH}$  ( $1.0 \times 10^{-2}$  M) system in air-equilibrated  $\text{CH}_2\text{Cl}_2$  recorded 0.08 ( $\Delta$ ), 1.0 ( $\blacktriangle$ ) and 6.3 ( $\circ$ )  $\mu\text{s}$  after the laser pulse.  $\lambda_{\text{exc}} = 355$  nm.

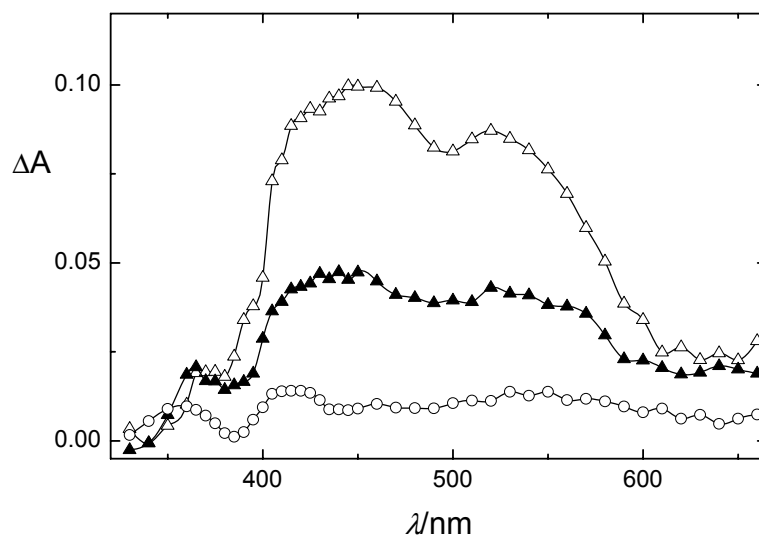

**Fig. S4** Rise kinetics of the cation  $\text{An}_2\text{CH}^+$ , generated by photolysis of the  $\text{NMQ}^+\text{BF}_4^-$  ( $2.6 \times 10^{-3}$  M)/toluene (1 M)/ $\text{An}_2\text{CHOH}$  system, recorded in air-equilibrated  $\text{CH}_2\text{Cl}_2$  at 510 nm with alcohol concentration 0.0046 (A), 0.01 (B) and 0.025 (C) M.  $\lambda_{\text{exc}} = 308$  nm.

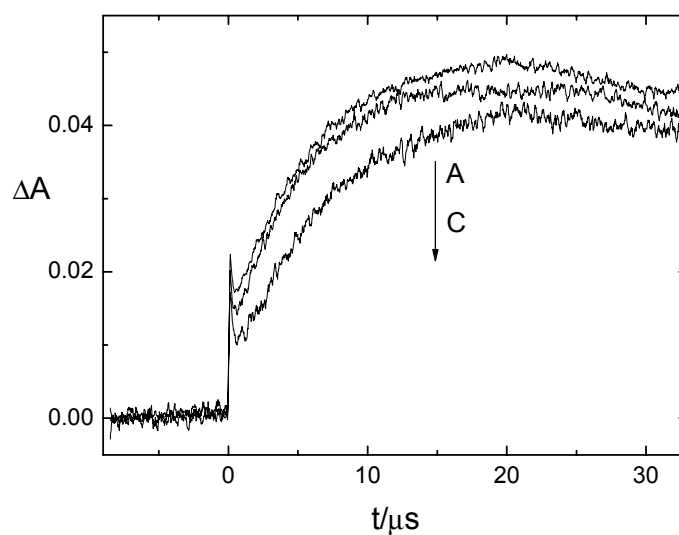

Supplement: b711541e.pdf [file b711541e.pdf]
